# Supplementary material
Source: MDPI journal article supplement (https://www.mdpi.com/2079-9284/11/3/73)
Supplement: s1 [file s1]

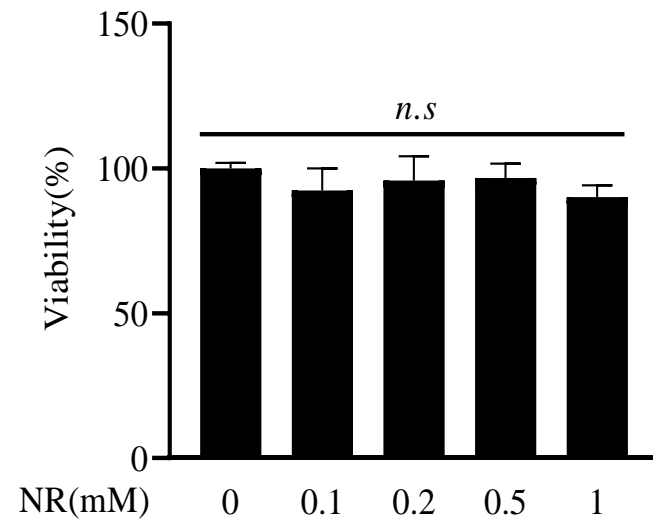

**Figure S1. NR has no effect on B16F10 cell growth at concentrations prior to 2mM.** NR unaffected on cell growth at concentrations below 2 mM in CCK8 assay. Relative to 0 mM control: \*  $p < 0.05$ , \*\*  $p < 0.01$ , \*\*\*  $p < 0.001$ , \*\*\*\*  $p < 0.0001$  (unpaired t-test). The data are expressed as the mean  $\pm$  SE.

(A)

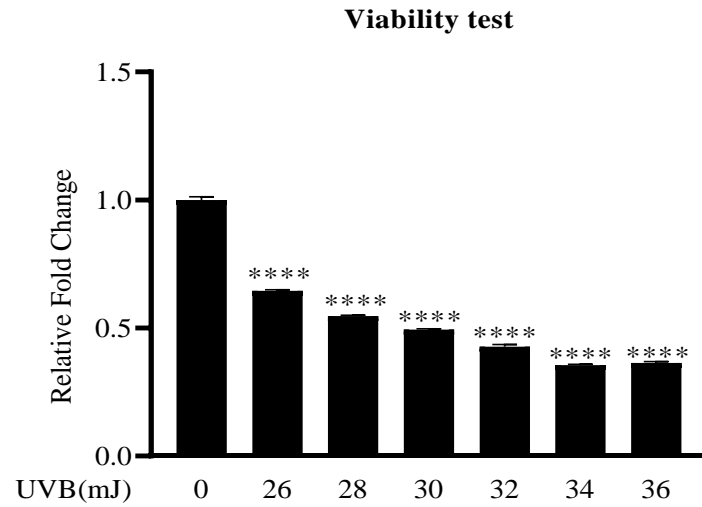

(B)

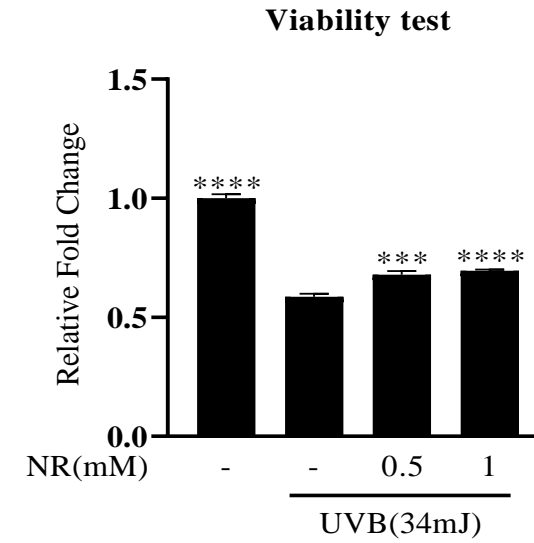

**Figure S2. NR protect UVB-induced cell death.** NR rescues cell viability against UVB-induced cell death in CCK8 assay. Viability test with different dose of UVB (A) and UVB 34mJ with NR (B). Relative to UVB control: \*  $p < 0.05$ , \*\*  $p < 0.01$ , \*\*\*  $p < 0.001$ , \*\*\*\*  $p < 0.0001$  (unpaired t-test). The data are expressed as the mean  $\pm$  SE.

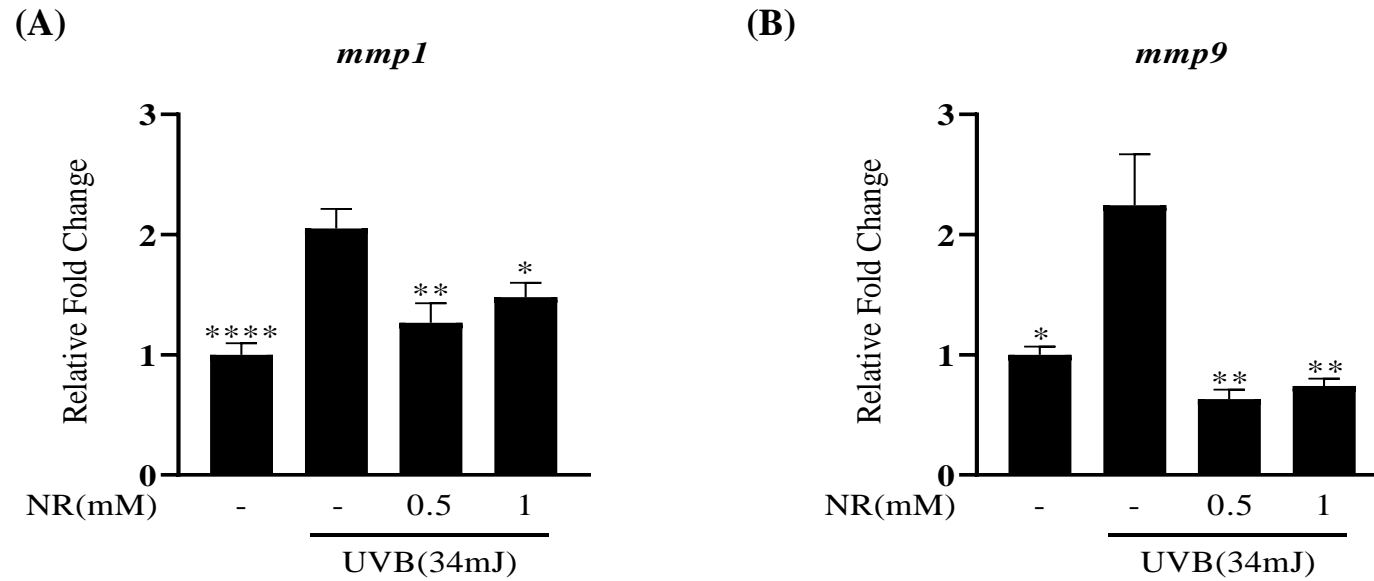

**Figure S3. NR decrease the gene expression of UVB-induced matrix metalloproteinase.** UVB-induced matrix metalloproteinase reduced NR treatment: *mmp1*(A), *mmp9* (B). Relative to UVB control: \* p < 0.05, \*\* p < 0.01, \*\*\* p < 0.001, \*\*\*\* p < 0.0001 (unpaired t-test). The data are expressed as the mean  $\pm$  SE.
